# Supplementary material for: Terahertz holographic data storage with a 3D printed phase plate
Source: Research Square preprint supplement (doi:10.21203/rs.3.rs-3504517/v1), 2023-11-09
Supplement: Supplementary file 1 [file 28a5cdbc7a4a6ce71ffb6066.pdf]

# Supplementary material: Terahertz holographic data storage with a 3D printed phase plate

E. Constable<sup>1</sup>, J. Gospodaric<sup>1</sup>, A. Pimenov<sup>1</sup>

<sup>1</sup>TU Wien, Solid state spectroscopy, Vienna, Austria

## 1 Polylactic acid refractive index

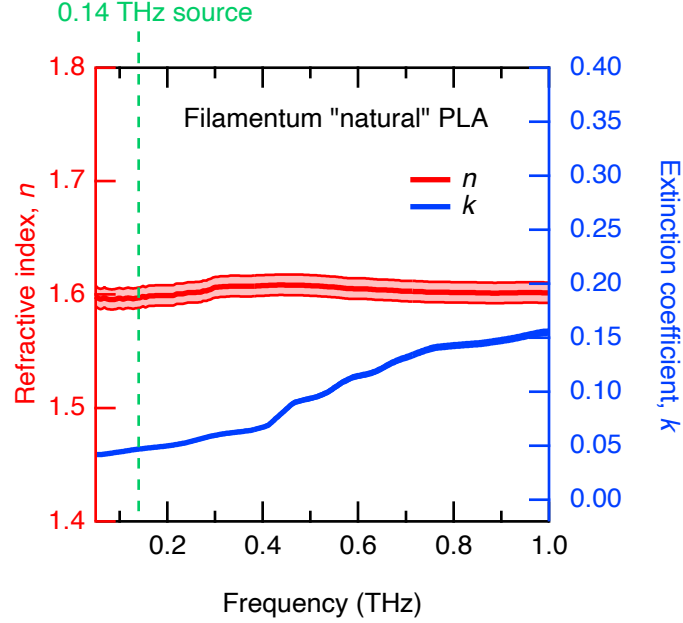

**Fig 1** Complex refractive index ( $\tilde{n} = n + ik$ ) for the polylactic acid (PLA) filament used in the construction of the holographic phase plate. Shaded areas give the uncertainty due to sample thickness with a measured value of  $d = 2.00 \pm 0.03$  mm. Anomalies in both  $n$  and  $k$  between 0.3 and 0.8 THz are due to residual water absorption in the optical path. The measurements were performed in transmission through atmosphere on a time-domain terahertz spectrometer utilising photoconductive antennae for the source and detector elements. The sample was 3D printed as a disc with a nominal thickness of 2 mm and a diameter of 10 mm. The print layer height was 0.2 mm with 100% rectilinear infill. The rectilinear infill alternates between 2 orthogonal directions for successive layer depositions, meaning there should be no polarisation dependence in the refractive index of the sample as a result of the layering direction.

## 2 Resolution of a simplified diffraction grating

The intensity profile of light diffracted by a grating as depicted in Fig. 2 is given by,<sup>1</sup>

$$I(\phi) = \left( \frac{\sin(\frac{N\phi}{2})}{\sin(\frac{\phi}{2})} \right)^2 I_0, \quad (1)$$

where  $I_0$  is the intensity of the incident light. From this we can deduce that the difference in the phase shift ( $\phi$ ) that produces a maximum and one that produces a neighboring minimum is given by,

$$\Delta\phi = \frac{2\pi}{N}. \quad (2)$$

From the geometry of Fig. 2 we can see that the infinitesimal relationship between a change in the phase shift and a change in the angle  $\theta$  is given by,

$$\frac{d\phi}{d\theta} = \frac{2\pi}{\lambda} d \cos(\theta), \quad (3)$$

or,

$$\begin{aligned} d\phi &= \frac{2\pi d}{\lambda} \frac{f}{\sqrt{x^2 + f^2}} d\theta, \\ &= \frac{2\pi d}{\lambda} \frac{f}{\sqrt{x^2 + f^2}} \frac{dx}{\sqrt{x^2 + f^2}}. \end{aligned} \quad (4)$$

Moving to the discrete approximation and equating Eq. 2 with Eq. 4, we get,

$$\frac{2\pi}{N} = \frac{2\pi d}{\lambda} \frac{f}{x^2 + f^2} \Delta x. \quad (5)$$

This implies a maximum resolving power, for displacement along  $x$ , of,

$$\Delta x = \frac{\lambda}{Nd} \frac{x^2 + f^2}{f}. \quad (6)$$

It should be noted that we have neglected the effects of a finite slit width ( $s$ ), assuming  $d \gg s$ . Thus, we have also neglected the envelope intensity profile resulting from a single slit. The interested reader is directed to standard textbooks on optics, e.g. Reference.<sup>1</sup>

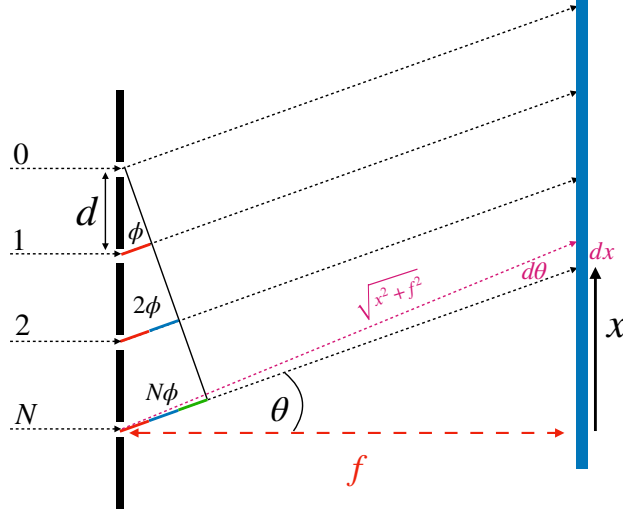

**Fig 2** Diagram of diffraction grating with  $N$  slits spaced  $d$  apart. The incident light is normal to the grating. The phase shift for beams emanating from neighboring slits and arriving at the blue plane on the right hand side is given by  $\phi = \frac{2\pi}{\lambda} d \sin(\theta)$ , where  $\lambda$  is the wavelength of the light.

### References

- 1 M. Born and E. Wolf, *Principles of optics: electromagnetic theory of propagation, interference and diffraction of light*, Elsevier (2013).
